# Supplementary material
Source: publisher site journal article supplement (https://www.dovepress.com/get_supplementary_file.php?f=337962.docx)
Supplement: Supplementary file 1 [file get_supplementary_file.php]

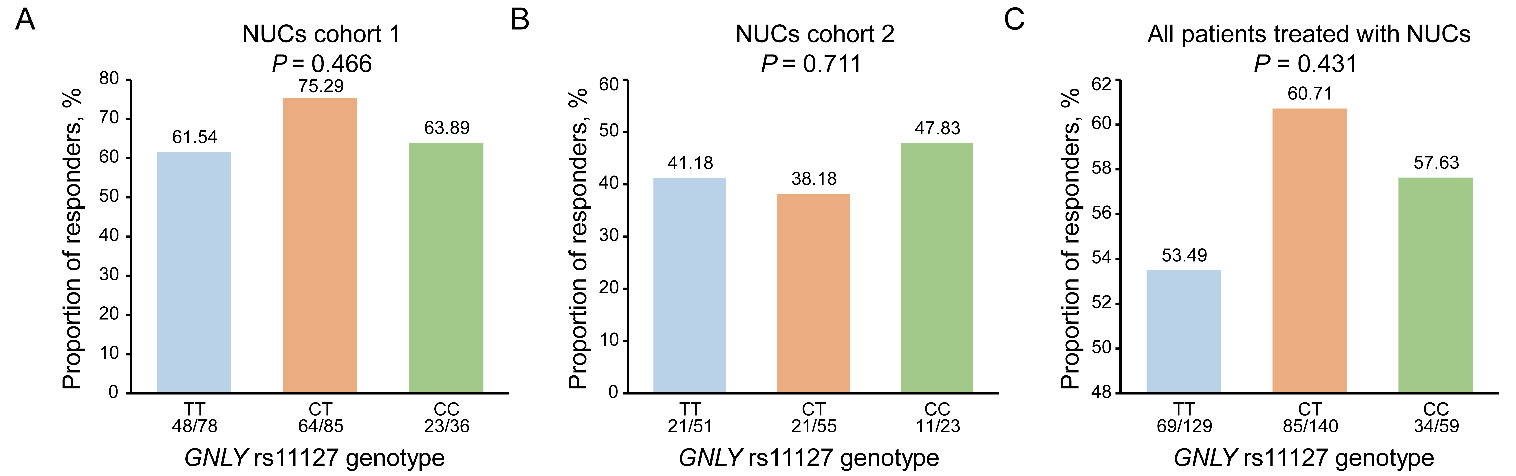


**Supplementary Figure 1** Association of *GNLY* rs11127 with CR in different NUCs cohorts. Bar graph showing the association between rs11127 genotype and CR inNUCs cohort 1 (**A**), NUCs 2 (**B**), and all the Chinese HBeAg-positive CHB patients treated with NUCs (**C**).

**Abbreviations:** CHB, chronic hepatitis B; CR, combined response; GNLY, granulysin; HBeAg, hepatitis B e antigen; NUCs, nucleoside analogues.


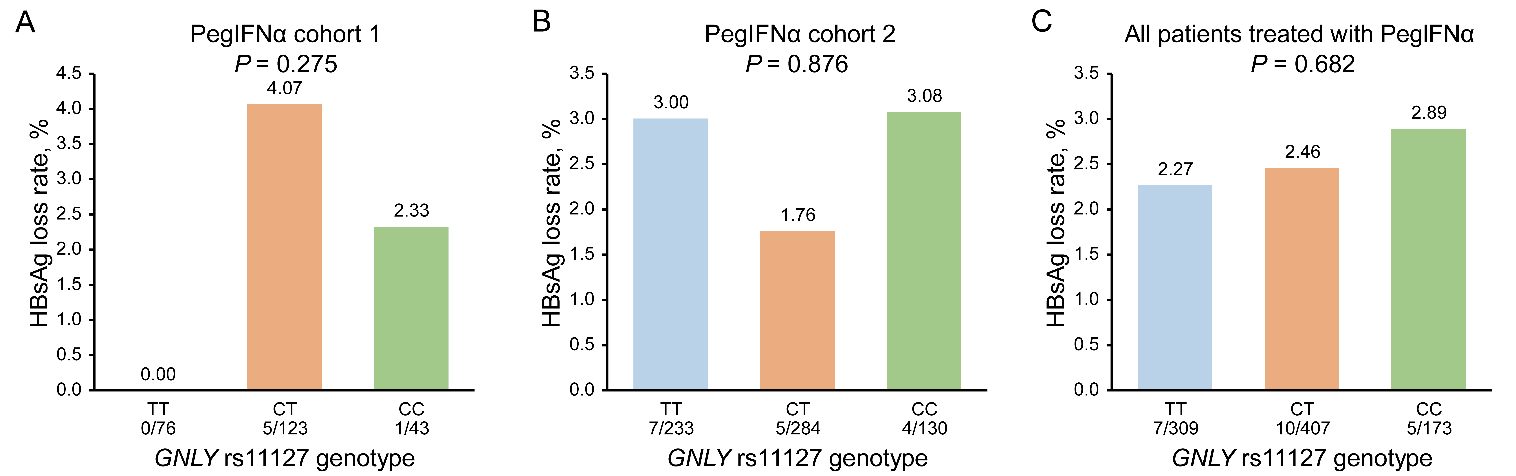


**Supplementary Figure 2** Association of *GNLY* rs11127 with HBsAg loss in different PegIFNα cohorts. Bar graph showing the association between rs11127 genotype and HBsAg loss in PegIFNα cohort 1 (**A**), PegIFNα cohort 2 (**B**), and all the Chinese HBeAg-positive CHB patients treated with PegIFNα (**C**). **Abbreviations:** CHB, chronic hepatitis B; GNLY, granulysin; HBsAg, hepatitis B s antigen; PegIFNα, pegylated interferon alpha.

**Supplementary Table 1. Patients’ allocations and treatment administration of each trial**

| Cohort | Group | Number | Dose & Course | Time of data collected | NCT number | Number of patients whose peripheral blood unavailable for genotyping |
| --- | --- | --- | --- | --- | --- | --- |
| PegIFNα cohort 1  （254 patients randomized） | 1A | 65 | Early responders *: PegIFNα-2a (Pegasys, Roche, Basel, Switzerlands) 180μg/wk for 48 weeks | April 2010 to March 2013 | NCT01086085 | 8 |
| 1B | 65 | Non-early responders: PegIFNα-2a，180μg/wk for 48 weeks |
| 1C | 63 | Non-early responders: PegIFNα-2a，180μg/wk for 96 weeks |
| 1D | 61 | Non-early responders: PegIFNα-2a，180μg/wk for 96 weeks, in combination with adefovir (10 mg/day, Hepsera; GSK, Brentford, UK) , from week 29 to week 64 |
| PegIFNα cohort 2 (728 patients randomized) | 2A | 478 | PegIFNα-2b (PegBeron, Xiamen Amoytop Biotech Co., Ltd, Xiamen, China) 180μg/wk for 48 weeks | March 2013 to August 2015 | NCT01760122 | 20 |
| 2B | 250 | PegIFNα-2a (Pegasys) 180μg/wk for 48 weeks |
| NUCs cohort 1 (564 patients randomized) | 3A | 285 | Telbivudine (Sebivo®) 600 mg/day for 104 weeks, among which about 200 patients were added on adefovir 10 mg/day | August 2009 to August 2012 | NCT00962533 | 11 |
| 3B | 279 | Telbivudine 600 mg/day for 104 weeks, among which about 100 patients were added on adefovir 10 mg/day |
| NUCs cohort 2 (334 patients randomized) | 4A | 111 | Lamivudine (LAM) 100mg/day + adefovir (ADV) for 104 weeks | March 2010 to May 2013 | NCT01088009 | 18 |
| 4B | 112 | LAM 100mg/day for 104 weeks, with/without ADV depending on the level of HBV DNA on week 24 |
| 4C | 111 | LAM mono for 104 weeks |

*Early responders were defined as patients with HBsAg <1500 IU/ml and HBV DNA <105 copies/ml at week 24.

**Abbreviations:** PegIFNα, pegylated interferon alpha; NUCs, nucleoside analogues.

**Supplementary Table 2. Association of *GNLY* rs11127 with other baseline variables**

| Baseline variables | *GNLY* rs11127 genotype | | | *P* |
| --- | --- | --- | --- | --- |
| TT | CT | CC |
| *PegIFNα cohort 1* |  |  |  |  |
| Male gender (%) | 65 (81.25) | 95 (76.00) | 38 (84.44) | 0.421 |
| Age, years; mean (SD) | 29.20 (7.58) | 28.52 (6.43) | 30 (6.40) | 0.466 |
| HBV genotype B (%) | 27 (34.18) | 53 (42.74) | 9 (20.00) | 0.023 |
| HBV DNA*, log10IU/mL; mean (SD) | 7.80 (1.12) | 7.61 (1.29) | 7.84 (1.38) | 0.924 |
| HBsAg*, log10IU/mL; mean (SD) | 4.05 (0.71) | 3.96 (0.78) | 4.17 (0.62) | 0.567 |
| HBeAg*, log10PEIU/mL; mean (SD) | 2.45 (0.95) | 2.31 (1.02) | 2.78 (0.78) | 0.735 |
| ALT*, ×ULN; mean (SD) | 1.22 (0.61) | 1.22 (0.69) | 1.21 (0.74) | 0.776 |
| *PegIFNα cohort 2* |  |  |  |  |
| Male gender (%) | 175 (75.11) | 196 (69.01) | 98 (75.38) | 0.216 |
| Age, years; mean (SD) | 29.50 (6.31) | 29.57 (6.78) | 30.03 (6.87) | 0.285 |
| HBV genotype (%) | 95 (41.48) | 107 (38.21) | 60 (46.15) | 0.309 |
| HBV DNA*, log10IU/mL; mean (SD) | 7.98 (0.72) | 7.94 (0.77) | 7.84 (0.80) | 0.1392 |
| HBsAg*, log10IU/mL; mean (SD) | 4.29 (0.53) | 4.28 (0.51) | 4.26 (0.57) | 0.252 |
| HBeAg*, log10PEIU/mL; mean (SD) | 3.01 (0.56) | 3.07 (0.56) | 3.04 (0.56) | 0.030 |
| ALT*, ×ULN; mean (SD) | 1.40 (0.44) | 1.41 (0.45) | 1.427(0.40) | 0.660 |

**Notes:** *Baseline level.

**Abbreviations:** GNLY, granulysin; PegIFNα, pegylated interferon alpha; HBV, hepatitis B virus; HBsAg, hepatitis B surface antigen; HBeAg, hepatitis B e antigen; ALT, alanine aminotransferase; SD, standard deviation; ULN, upper limit of normal.

**Supplementary Table 3. Univariate logistic regression analysis of rs11127 with CR**

| **Parameters** | **PegIFNα cohort 1** | |  | **PegIFNα cohort 2** | |  | **PegIFNα cohort  combination** | |
| --- | --- | --- | --- | --- | --- | --- | --- | --- |
| **OR (95% CI)** | ***P*** |  | **OR (95% CI)** | ***P*** |  | **OR (95% CI)** | ***P*** |
| Trial (PegIFNα cohort 1 vs. 2) | NA | NA |  | NA | NA |  | 1.37 (0.95-1.98) | 0.091 |
| Gender (Female) | 1.14 (0.55-2.36) | 0.730 |  | 1.31 (0.83-2.06) | 0.250 |  | 1.23 (0.84-1.81) | 0.286 |
| Age, years | 0.98 (0.94-1.02) | 0.286 |  | 0.94 (0.91-0.98) | 0.001 |  | 0.96 (0.93-0.98) | <0.001 |
| HBV genotype (B vs. C) | 1.82 (0.96-3.46) | 0.067 |  | 2.57 (1.68-3.92) | <0.001 |  | 2.27 (1.60-3.22) | <0.001 |
| HBV DNA*, log10 IU/mL* | 0.81 (0.63-1.03) | 0.084 |  | 0.72 (0.56-0.93) | 0.013 |  | 0.75 (0.63-0.90) | 0.002 |
| HBsAg*, log10 IU/mL | 0.63 (0.41-0.95) | 0.027 |  | 0.58 (0.40-0.84) | 0.003 |  | 0.58 (0.45-0.77) | <0.001 |
| HBeAg*, log10 PEIU/mL | 0.61 (0.44-0.83) | 0.002 |  | 0.31 (0.20-0.48) | <0.001 |  | 0.49 (0.39-0.62) | <0.001 |
| ALT*, loge ×ULN | 1.89 (1.17-3.06) | 0.009 |  | 1.88 (1.19-3.00) | 0.007 |  | 1.80 (1.29-2.51) | <0.001 |
| *STAT4* genotype | 1.54 (0.99-2.40) | 0.056 |  | 1.30 (0.95-1.78) | 0.096 |  | 1.38 (1.07-1.78) | 0.013 |
| *CFB* genotype | 8.96 (1.15-69.79) | 0.036 |  | 3.94 (1.19-13.06) | 0.025 |  | 5.02 (1.78-14.13) | 0.002 |
| *CD55* genotype | 4.23 (1.11-16.14) | 0.035 |  | 3.49 (1.64-7.46) | 0.001 |  | 3.67 (1.91-7.06) | <0.001 |
| *GNLY* genotype | 1.44 (0.91-2.28) | 0.118 |  | 1.33 (1.00-1.77) | 0.047 |  | 1.35 (1.06-1.72) | 0.013 |

**Notes:** *Baseline level.

**Abbreviations:** CR, combined response; PegIFNα, pegylated interferon alpha; HBV, hepatitis B virus; HBsAg, hepatitis B surface antigen; HBeAg, hepatitis B e antigen; OR, odds ratio; CI, confidence interval; ALT, alanine aminotransferase; ULN, upper limit of normal; NA, not available; STAT4, signal transducer and activator of transcription 4; CFB, complement factor B; GNLY, granulysin.

**Supplementary Table 4. ROC Contrast Estimation and Testing Results in PegIFNα cohort combination**

| **Contrast** | **Estimate** | **Standard Error** | **95% Wald Confidence Limits** | | **Chi-Square** | ***P*** |
| --- | --- | --- | --- | --- | --- | --- |
| **Model 2 VS. Model 1** | 0.028 | 0.012 | 0.004 | 0.052 | 5.042 | 0.025 |

**Note:** Model 1. Only clinical variables were included

Model 2. Clinical variables + PGS

**Abbreviations:** PegIFNα, pegylated interferon alpha; PGS, polygenic score; ROC, receiver operating characteristic curve.
